# Supplementary material for: Assembly of anisotropic one dimensional Ag nanostructures through orientated attachment: on-axis or off-axis growth?
Source: Royal Society of Chemistry journal article supplement (doi:10.1039/c5ra02018b), 2015-01-01
Supplement: c5ra02018b1.pdf [file c5ra02018b1.pdf]

## Supporting Information

### Assembly of anisotropic one dimensional Ag nanostructures through orientated attachment: on-axis or off-axis growth?

Weiqliang Lv<sup>1</sup>, Yaxing Zhu,<sup>1</sup> Yinghua Niu<sup>1</sup>, Weirong Huo<sup>1</sup>, Kang Li<sup>1</sup>, Gaolong Zhu<sup>1</sup>, Yachun Liang<sup>1</sup>, Wenzhan Wu<sup>2</sup>, Weidong He<sup>1, 3, 4\*</sup>

<sup>1</sup>School of Energy Science and Engineering, University of Electronic Science and Technology of China (UESTC), Chengdu 611731, PR

China, <sup>2</sup>Department of Chemistry, the Hong Kong University of Science and Technology, Hong Kong SAR, PR China, <sup>3</sup>Interdisciplinary

Program in Materials Science, Vanderbilt University, Nashville, Tennessee 37234-0106, USA, <sup>4</sup>Vanderbilt Institute of Nanoscale Science

and Engineering, Vanderbilt University, Nashville, Tennessee 37234-0106, USA. Correspondence and requests for materials should be

addressed to W. H. (email: weidong.he@uestc.edu.cn and weidong.he@vanderbilt.edu).

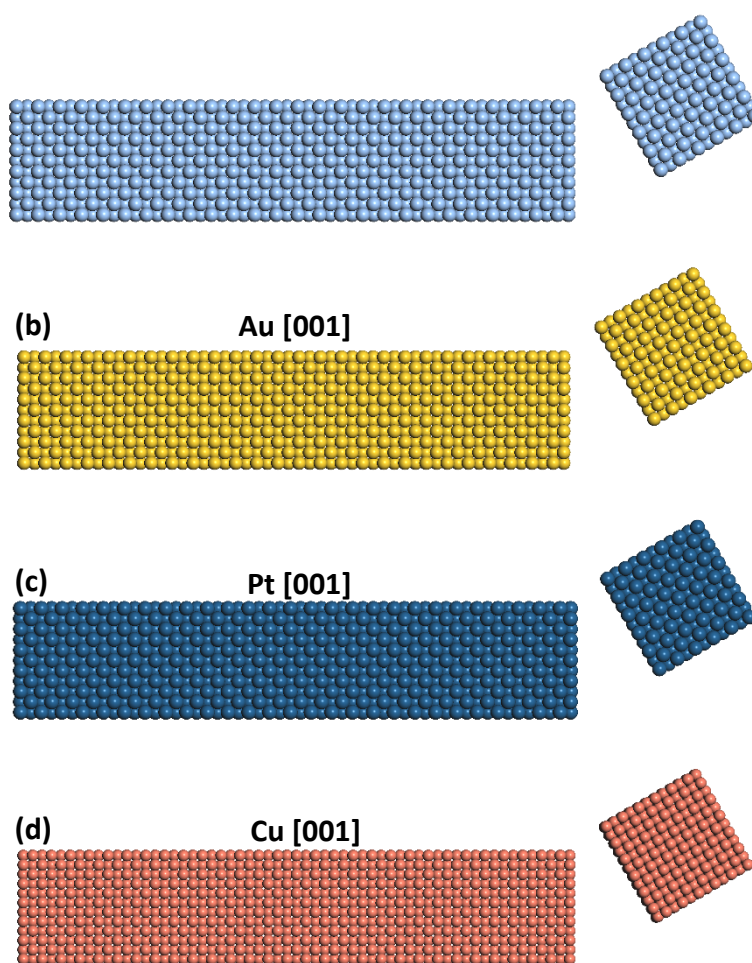

**Figure S1** NR- NP attachment modes of off-axis growth for (a) an anatase Ag nanorod along [001] and a Ag nanoparticle; (b) an Au nanorod along [001] and a Au nanoparticle; (c) a Pt nanorod along [100] and a Pt nanoparticle. The diameters of all nanorods and nanoparticles are 2.0 nm. The aspect ratios of all nanorods are 5.

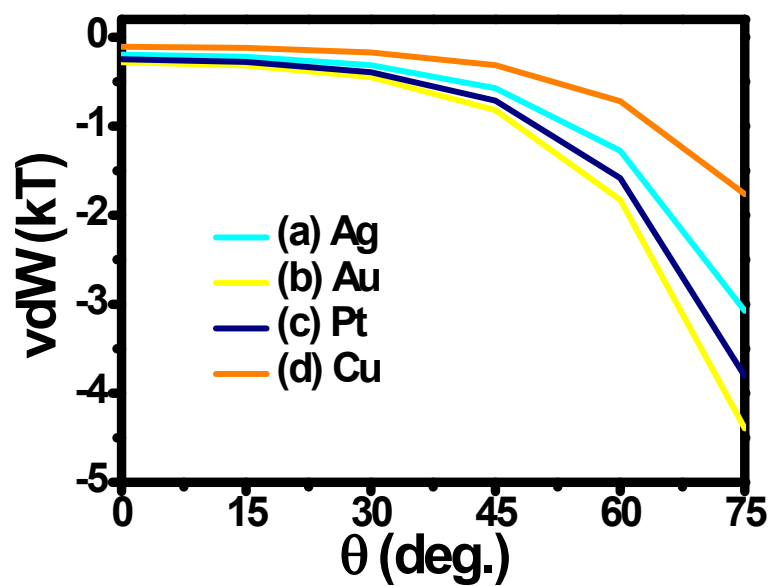

**Figure S2** Calculated vdW interaction *versus* approaching angle of off-axis growth between (a) an Ag nanorod along [100] and an Ag nanoparticle; (b) a Au nanorod along [100] and an Au nanoparticle; (c) a Pt nanorod along [100] and a Pt nanoparticle. (d) a Cu nanorod along [100] and a Cu nanoparticle. The diameters of all nanorods and nanoparticles are approximately 2.0 nm. The aspect ratios of all nanorods are 5. The temperature is 293 K.

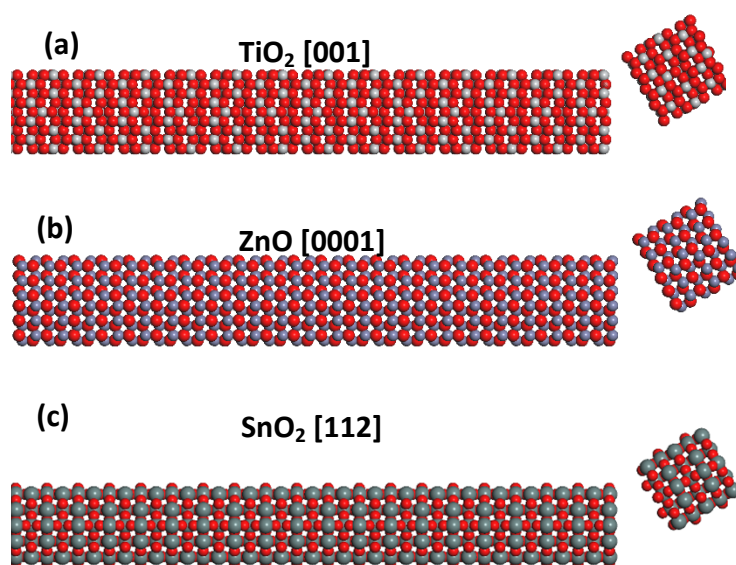

**Figure S3** NR- NP attachment modes of off-axis growth for (a) an anatase  $\text{TiO}_2$  nanorod along [001] and a  $\text{TiO}_2$  nanoparticle; (b) a ZnO nanorod along [0001] and a ZnO nanoparticle; (c) a  $\text{SnO}_2$  nanorod along [110] and a  $\text{SnO}_2$  nanoparticle. The diameters of all nanorods and nanoparticles are 1.6 nm. The aspect ratios of all nanorods are 10.

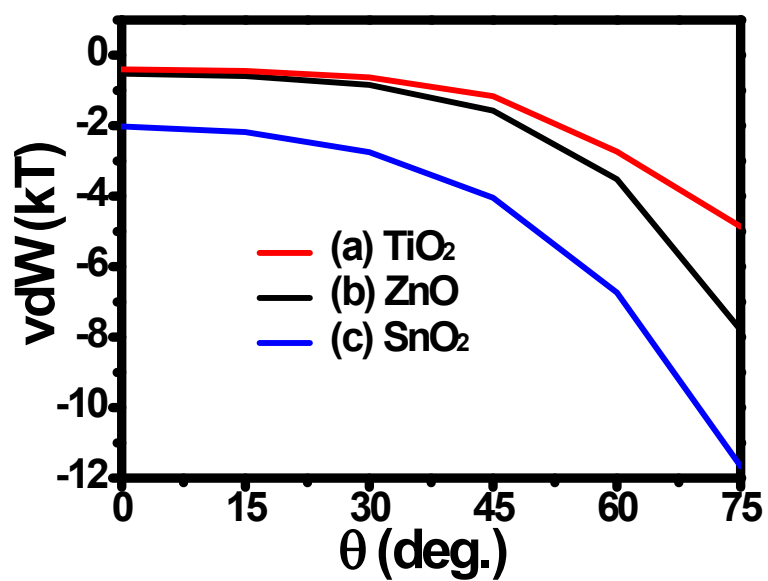

**Figure S4** Calculated vdW interaction *versus* approaching angle of off-axis growth between (a) an anatase  $\text{TiO}_2$  nanorod along [001] and a  $\text{TiO}_2$  nanoparticle; (b) a  $\text{ZnO}$  nanorod along [0001] and a  $\text{ZnO}$  nanoparticle; (c) a  $\text{SnO}_2$  nanorod along [110] and a  $\text{SnO}_2$  nanoparticle. The diameters of all nanorods and nanoparticles are approximately 1.6 nm. The aspect ratios of all nanorods are 10. The temperature is 293 K.
